# Supplementary material for: Thunder-DDA-PASEF enables high-coverage immunopeptidomics and is boosted by MS2Rescore with MS2PIP timsTOF fragmentation prediction model
Source: Nat Commun. 2024 Mar 13;15:2288. doi: 10.1038/s41467-024-46380-y (PMC10937930; doi:10.1038/s41467-024-46380-y)
Supplement: Supplementary file 11 — Supplementary Data 7 [file 41467_2024_46380_MOESM11_ESM.xlsx]

## Sheet: Info
Gene enrichment analysis using GORILLA
Author	David GZ
Date	2022-11-29
Enrichment analysis of the proteins represented by the predicted binders specifically found in JY, Raji or both (jy_raji)
Input	3_results\05_JY_Raji_ligandome_06133\prot_by_cell_binder_06133.csv
	Mode = two unranked lists of genes, with default parameters
	Background = all the proteins covered
	Target = each specific list
output	tables in this file
	Figures were also exported to the same folder
	Temporal links
jy	http://cbl-gorilla.cs.technion.ac.il/GOrilla/upddhtgg/GOResults.html
jy_raji	http://cbl-gorilla.cs.technion.ac.il/GOrilla/562lf8jl/GOResults.html
raji	http://cbl-gorilla.cs.technion.ac.il/GOrilla/8pifud60/GOResults.html
P-value' is the enrichment p-value computed according to the mHG or HG model. This p-value is not corrected for multiple testing of 1735 GO terms.
'FDR q-value' is the correction of the above p-value for multiple testing using the Benjamini and Hochberg (1995) method.
Namely, for the ith term (ranked according to p-value) the FDR q-value is (p-value * number of GO terms) / i.
Enrichment (N, B, n, b) is defined as follows:
N - is the total number of genes
B - is the total number of genes associated with a specific GO term
n - is the number of genes in the top of the user's input list or in the target set when appropriate
b - is the number of genes in the intersection
Enrichment = (b/n) / (B/N)
Genes: For each GO term you can see the list of associated genes that appear in the optimal top of the list.
Each gene name is specified by gene symbol followed by a short description of the gene

## Sheet: jy_process
GO term	Description	P-value	FDR q-value	Enrichment (N, B, n, b)
GO:0051017	actin filament bundle assembly	0.000337	0.42	2.35 (7600,27,1793,15)
GO:0034765	regulation of ion transmembrane transport	0.000512	0.456	1.54 (7600,138,1793,50)
GO:0007528	neuromuscular junction development	0.000476	0.457	2.83 (7600,15,1793,10)
GO:0061572	actin filament bundle organization	0.000337	0.467	2.35 (7600,27,1793,15)
GO:0022610	biological adhesion	0.000306	0.478	1.40 (7600,254,1793,84)
GO:0034762	regulation of transmembrane transport	0.000238	0.494	1.50 (7600,175,1793,62)
GO:0003341	cilium movement	0.000476	0.495	2.83 (7600,15,1793,10)
GO:0023052	signaling	0.000281	0.5	1.62 (7600,115,1793,44)
GO:0014911	positive regulation of smooth muscle cell migration	0.000476	0.54	2.83 (7600,15,1793,10)
GO:0007267	cell-cell signaling	0.000226	0.563	1.68 (7600,101,1793,40)
GO:0034331	cell junction maintenance	0.000728	0.567	4.24 (7600,5,1793,5)
GO:0003008	system process	0.000685	0.57	1.31 (7600,359,1793,111)
GO:0007155	cell adhesion	0.000197	0.614	1.42 (7600,251,1793,84)
GO:0007186	G protein-coupled receptor signaling pathway	6.07e-05	0.756	1.55 (7600,178,1793,65)
GO:2001257	regulation of cation channel activity	0.000183	0.759	2.07 (7600,45,1793,22)
GO:0050808	synapse organization	0.00014	0.876	2.00 (7600,53,1793,25)
Species used: Homo sapiens
The system has recognized 9537 genes out of 9611 gene terms entered by the user.
0 genes were recognized by gene symbol and 9537 genes by other gene IDs .
1835 duplicate genes were removed (keeping the highest ranking instance of each gene) leaving a total of 7702 genes.
Only 7600 of these genes are associated with a GO term.
The GOrilla database is periodically updated using the GO database and other sources.
The GOrilla database was last updated on Mar 6, 2021

## Sheet: jy_function
GO term	Description	P-value	FDR q-value	Enrichment (N, B, n, b)
GO:0004930	G protein-coupled receptor activity	8.31e-06	0.0291	2.06 (7600,66,1793,32)
GO:0038023	signaling receptor activity	8.42e-06	0.0147	1.54 (7600,229,1793,83)
GO:0004888	transmembrane signaling receptor activity	9.64e-06	0.0112	1.63 (7600,166,1793,64)
GO:0060089	molecular transducer activity	2.63e-05	0.023	1.47 (7600,256,1793,89)
GO:0001653	peptide receptor activity	4.24e-05	0.0297	2.90 (7600,19,1793,13)
GO:0008528	G protein-coupled peptide receptor activity	4.24e-05	0.0247	2.90 (7600,19,1793,13)
GO:0005509	calcium ion binding	0.000215	0.107	1.51 (7600,171,1793,61)
GO:0030545	receptor regulator activity	0.000389	0.17	1.83 (7600,65,1793,28)
GO:0022843	voltage-gated cation channel activity	0.000726	0.282	2.59 (7600,18,1793,11)
GO:0008188	neuropeptide receptor activity	0.000728	0.255	4.24 (7600,5,1793,5)
GO:0004620	phospholipase activity	0.000753	0.239	2.06 (7600,37,1793,18)
GO:0022838	substrate-specific channel activity	0.0008	0.233	1.71 (7600,77,1793,31)
GO:0005216	ion channel activity	0.0008	0.215	1.71 (7600,77,1793,31)
GO:0022803	passive transmembrane transporter activity	0.000861	0.215	1.66 (7600,87,1793,34)
GO:0015267	channel activity	0.000861	0.201	1.66 (7600,87,1793,34)
Species used: Homo sapiens
The system has recognized 9537 genes out of 9611 gene terms entered by the user.
0 genes were recognized by gene symbol and 9537 genes by other gene IDs .
1835 duplicate genes were removed (keeping the highest ranking instance of each gene) leaving a total of 7702 genes.
Only 7600 of these genes are associated with a GO term.
The GOrilla database is periodically updated using the GO database and other sources.
The GOrilla database was last updated on Mar 6, 2021

## Sheet: jy_component
GO term	Description	P-value	FDR q-value	Enrichment (N, B, n, b)
GO:0031224	intrinsic component of membrane	3.15e-08	5.47e-05	1.23 (7600,1463,1793,426)
GO:0044425	membrane part	4.82e-08	4.18e-05	1.18 (7600,2192,1793,608)
GO:0005886	plasma membrane	1.47e-07	8.48e-05	1.23 (7600,1374,1793,399)
GO:0016021	integral component of membrane	1.82e-07	7.91e-05	1.22 (7600,1439,1793,415)
GO:0044459	plasma membrane part	5.34e-06	0.00185	1.28 (7600,787,1793,237)
GO:0031226	intrinsic component of plasma membrane	1.64e-05	0.00473	1.43 (7600,327,1793,110)
GO:0005887	integral component of plasma membrane	0.000141	0.0349	1.39 (7600,306,1793,100)
GO:0005615	extracellular space	0.000253	0.0549	1.38 (7600,285,1793,93)
GO:0005576	extracellular region	0.000546	0.105	1.31 (7600,383,1793,118)
GO:0034702	ion channel complex	0.000815	0.141	1.90 (7600,49,1793,22)
Species used: Homo sapiens
The system has recognized 9537 genes out of 9611 gene terms entered by the user.
0 genes were recognized by gene symbol and 9537 genes by other gene IDs .
1835 duplicate genes were removed (keeping the highest ranking instance of each gene) leaving a total of 7702 genes.
Only 7600 of these genes are associated with a GO term.

## Sheet: jy_raji_process
GO term	Description	P-value	FDR q-value	Enrichment (N, B, n, b)
GO:0090304	nucleic acid metabolic process	4.79e-21	5.97e-17	1.23 (7600,1521,3612,886)
GO:0006139	nucleobase-containing compound metabolic process	4.07e-19	2.54e-15	1.19 (7600,1814,3612,1027)
GO:0046483	heterocycle metabolic process	1.03e-17	4.27e-14	1.18 (7600,1883,3612,1055)
GO:0006725	cellular aromatic compound metabolic process	7.93e-17	2.47e-13	1.17 (7600,1888,3612,1053)
GO:1901360	organic cyclic compound metabolic process	7.39e-16	1.84e-12	1.16 (7600,1972,3612,1090)
GO:0034641	cellular nitrogen compound metabolic process	3.86e-15	8.02e-12	1.16 (7600,2040,3612,1120)
GO:0044403	symbiont process	6.82e-15	1.06e-11	1.34 (7600,540,3612,343)
GO:0016070	RNA metabolic process	8.22e-15	1.14e-11	1.23 (7600,1060,3612,620)
GO:0016032	viral process	6.82e-15	1.22e-11	1.34 (7600,540,3612,343)
GO:0044419	interspecies interaction between organisms	9.87e-15	1.23e-11	1.31 (7600,605,3612,378)
GO:0043170	macromolecule metabolic process	1.03e-13	1.17e-10	1.10 (7600,3316,3612,1735)
GO:0051641	cellular localization	5.64e-13	5.87e-10	1.19 (7600,1351,3612,761)
GO:0051704	multi-organism process	1.2e-11	1.16e-08	1.24 (7600,804,3612,472)
GO:0006807	nitrogen compound metabolic process	4.11e-11	3.66e-08	1.08 (7600,3712,3612,1906)
GO:0044237	cellular metabolic process	9.36e-11	7.78e-08	1.07 (7600,4091,3612,2083)
GO:0033036	macromolecule localization	1.15e-10	8.96e-08	1.19 (7600,1107,3612,624)
GO:0044238	primary metabolic process	1.27e-10	9.33e-08	1.07 (7600,3903,3612,1993)
GO:0034645	cellular macromolecule biosynthetic process	1.45e-10	1e-07	1.25 (7600,629,3612,375)
GO:0007346	regulation of mitotic cell cycle	2.53e-10	1.66e-07	1.31 (7600,424,3612,264)
GO:0008152	metabolic process	3.29e-10	2.05e-07	1.07 (7600,4276,3612,2166)
GO:0051052	regulation of DNA metabolic process	3.87e-10	2.19e-07	1.37 (7600,300,3612,195)
GO:0008104	protein localization	3.7e-10	2.2e-07	1.18 (7600,1089,3612,612)
GO:0006886	intracellular protein transport	4.48e-10	2.43e-07	1.28 (7600,509,3612,309)
GO:0071705	nitrogen compound transport	5.87e-10	3.05e-07	1.20 (7600,943,3612,536)
GO:0010564	regulation of cell cycle process	8.13e-10	4.05e-07	1.28 (7600,496,3612,301)
GO:0051726	regulation of cell cycle	8.93e-10	4.28e-07	1.22 (7600,748,3612,434)
GO:1901990	regulation of mitotic cell cycle phase transition	1.04e-09	4.82e-07	1.36 (7600,297,3612,192)
GO:0048518	positive regulation of biological process	1.89e-09	8.41e-07	1.09 (7600,2833,3612,1471)
GO:0009059	macromolecule biosynthetic process	2.21e-09	9.5e-07	1.22 (7600,744,3612,430)
GO:0033554	cellular response to stress	2.44e-09	1.02e-06	1.18 (7600,1055,3612,590)
GO:0071704	organic substance metabolic process	2.97e-09	1.19e-06	1.07 (7600,4055,3612,2054)
GO:1903311	regulation of mRNA metabolic process	4.72e-09	1.84e-06	1.38 (7600,247,3612,162)
GO:0006396	RNA processing	5.01e-09	1.89e-06	1.23 (7600,623,3612,365)
GO:0019222	regulation of metabolic process	6.37e-09	2.27e-06	1.08 (7600,3257,3612,1671)
GO:1901987	regulation of cell cycle phase transition	6.32e-09	2.32e-06	1.33 (7600,316,3612,200)
GO:0016071	mRNA metabolic process	6.93e-09	2.4e-06	1.26 (7600,490,3612,294)
GO:0051649	establishment of localization in cell	7.79e-09	2.62e-06	1.17 (7600,1049,3612,584)
GO:0044265	cellular macromolecule catabolic process	8.97e-09	2.94e-06	1.24 (7600,591,3612,347)
GO:0051236	establishment of RNA localization	9.54e-09	3.05e-06	1.50 (7600,139,3612,99)
GO:0033365	protein localization to organelle	1.03e-08	3.14e-06	1.27 (7600,467,3612,281)
GO:0006974	cellular response to DNA damage stimulus	1.02e-08	3.19e-06	1.24 (7600,546,3612,323)
GO:0045184	establishment of protein localization	1.16e-08	3.45e-06	1.20 (7600,809,3612,460)
GO:0046907	intracellular transport	1.3e-08	3.78e-06	1.18 (7600,936,3612,525)
GO:0060255	regulation of macromolecule metabolic process	1.65e-08	4.68e-06	1.08 (7600,2992,3612,1540)
GO:0050657	nucleic acid transport	2.2e-08	5.96e-06	1.49 (7600,137,3612,97)
GO:0050658	RNA transport	2.2e-08	6.1e-06	1.49 (7600,137,3612,97)
GO:0006259	DNA metabolic process	2.42e-08	6.3e-06	1.23 (7600,572,3612,335)
GO:0033044	regulation of chromosome organization	2.4e-08	6.37e-06	1.35 (7600,267,3612,171)
GO:0010608	posttranscriptional regulation of gene expression	3.84e-08	9.21e-06	1.29 (7600,367,3612,225)
GO:0044260	cellular macromolecule metabolic process	3.77e-08	9.21e-06	1.09 (7600,2686,3612,1389)
GO:0015833	peptide transport	3.74e-08	9.32e-06	1.20 (7600,762,3612,433)
GO:0009894	regulation of catabolic process	3.73e-08	9.49e-06	1.21 (7600,654,3612,377)
GO:0051168	nuclear export	4.52e-08	1.06e-05	1.51 (7600,123,3612,88)
GO:0010604	positive regulation of macromolecule metabolic process	4.65e-08	1.07e-05	1.12 (7600,1669,3612,890)
GO:0006913	nucleocytoplasmic transport	4.8e-08	1.09e-05	1.41 (7600,185,3612,124)
GO:0050789	regulation of biological process	5.54e-08	1.23e-05	1.05 (7600,4819,3612,2402)
GO:1903047	mitotic cell cycle process	6.74e-08	1.47e-05	1.25 (7600,466,3612,277)
GO:0006281	DNA repair	7.93e-08	1.7e-05	1.28 (7600,386,3612,234)
GO:0015031	protein transport	8.33e-08	1.76e-05	1.19 (7600,756,3612,428)
GO:0051169	nuclear transport	8.65e-08	1.8e-05	1.40 (7600,188,3612,125)
GO:0051173	positive regulation of nitrogen compound metabolic process	9.41e-08	1.92e-05	1.12 (7600,1585,3612,846)
GO:0009987	cellular process	1.02e-07	2.06e-05	1.03 (7600,6272,3612,3067)
GO:0031329	regulation of cellular catabolic process	1.42e-07	2.82e-05	1.21 (7600,604,3612,348)
GO:0042886	amide transport	1.45e-07	2.82e-05	1.18 (7600,780,3612,439)
GO:0051983	regulation of chromosome segregation	1.58e-07	3.02e-05	1.57 (7600,90,3612,67)
GO:0051179	localization	1.85e-07	3.49e-05	1.09 (7600,2326,3612,1208)
GO:0009893	positive regulation of metabolic process	2.18e-07	4.06e-05	1.11 (7600,1805,3612,952)
GO:0071840	cellular component organization or biogenesis	2.56e-07	4.7e-05	1.08 (7600,2722,3612,1399)
GO:0051716	cellular response to stimulus	2.87e-07	5.18e-05	1.12 (7600,1524,3612,812)
GO:0022402	cell cycle process	2.95e-07	5.25e-05	1.20 (7600,665,3612,378)
GO:0080090	regulation of primary metabolic process	3.84e-07	6.74e-05	1.08 (7600,2918,3612,1492)
GO:0008150	biological_process	3.92e-07	6.79e-05	1.01 (7600,7188,3612,3465)
GO:0045935	positive regulation of nucleobase-containing compound metabolic process	4.72e-07	8.06e-05	1.15 (7600,1008,3612,552)
GO:0051171	regulation of nitrogen compound metabolic process	4.98e-07	8.38e-05	1.08 (7600,2829,3612,1448)
GO:0080134	regulation of response to stress	5.17e-07	8.6e-05	1.17 (7600,800,3612,446)
GO:0033045	regulation of sister chromatid segregation	6.61e-07	0.000109	1.59 (7600,74,3612,56)
GO:0006996	organelle organization	7.78e-07	0.000126	1.12 (7600,1394,3612,744)
GO:0009891	positive regulation of biosynthetic process	7.94e-07	0.000127	1.15 (7600,1013,3612,553)
GO:0031323	regulation of cellular metabolic process	8.57e-07	0.000134	1.07 (7600,3006,3612,1531)
GO:0034248	regulation of cellular amide metabolic process	8.55e-07	0.000135	1.29 (7600,286,3612,176)
GO:0006405	RNA export from nucleus	9.53e-07	0.000147	1.50 (7600,101,3612,72)
GO:0048522	positive regulation of cellular process	9.66e-07	0.000147	1.08 (7600,2537,3612,1304)
GO:0031328	positive regulation of cellular biosynthetic process	1.1e-06	0.000163	1.15 (7600,1005,3612,548)
GO:0033047	regulation of mitotic sister chromatid segregation	1.12e-06	0.000165	1.62 (7600,65,3612,50)
GO:0051028	mRNA transport	1.1e-06	0.000165	1.48 (7600,108,3612,76)
GO:0010557	positive regulation of macromolecule biosynthetic process	1.21e-06	0.000176	1.15 (7600,966,3612,528)
GO:0044271	cellular nitrogen compound biosynthetic process	1.27e-06	0.000181	1.16 (7600,842,3612,465)
GO:0015931	nucleobase-containing compound transport	1.34e-06	0.000189	1.39 (7600,164,3612,108)
GO:0006413	translational initiation	1.42e-06	0.000199	1.46 (7600,117,3612,81)
GO:0031325	positive regulation of cellular metabolic process	1.49e-06	0.000204	1.11 (7600,1663,3612,875)
GO:0072594	establishment of protein localization to organelle	1.48e-06	0.000206	1.29 (7600,284,3612,174)
GO:0051276	chromosome organization	1.56e-06	0.000211	1.29 (7600,286,3612,175)
GO:0048519	negative regulation of biological process	1.62e-06	0.000217	1.08 (7600,2494,3612,1281)
GO:0034613	cellular protein localization	1.67e-06	0.000222	1.19 (7600,648,3612,365)
GO:0016043	cellular component organization	1.82e-06	0.000237	1.08 (7600,2683,3612,1372)
GO:0009057	macromolecule catabolic process	1.82e-06	0.000238	1.18 (7600,662,3612,372)
GO:0070727	cellular macromolecule localization	2.13e-06	0.000273	1.18 (7600,655,3612,368)
GO:0051128	regulation of cellular component organization	2.33e-06	0.000297	1.12 (7600,1271,3612,679)
GO:0065007	biological regulation	2.44e-06	0.000307	1.04 (7600,5092,3612,2514)
GO:0034654	nucleobase-containing compound biosynthetic process	2.62e-06	0.000327	1.19 (7600,623,3612,351)
GO:0071702	organic substance transport	2.65e-06	0.000328	1.14 (7600,1070,3612,578)
GO:0006417	regulation of translation	2.9e-06	0.000354	1.30 (7600,251,3612,155)
GO:0010965	regulation of mitotic sister chromatid separation	2.99e-06	0.000362	1.65 (7600,55,3612,43)
GO:0034660	ncRNA metabolic process	3.11e-06	0.000372	1.23 (7600,418,3612,244)
GO:0061013	regulation of mRNA catabolic process	3.36e-06	0.000399	1.38 (7600,159,3612,104)
GO:0080135	regulation of cellular response to stress	3.52e-06	0.000414	1.22 (7600,449,3612,260)
GO:1902749	regulation of cell cycle G2/M phase transition	3.81e-06	0.000444	1.36 (7600,170,3612,110)
GO:0051246	regulation of protein metabolic process	3.89e-06	0.000449	1.12 (7600,1363,3612,723)
GO:0033043	regulation of organelle organization	4.06e-06	0.000461	1.16 (7600,760,3612,420)
GO:0006606	protein import into nucleus	4.04e-06	0.000462	1.59 (7600,65,3612,49)
GO:0060968	regulation of gene silencing	4.18e-06	0.00047	1.48 (7600,95,3612,67)
GO:0010389	regulation of G2/M transition of mitotic cell cycle	4.69e-06	0.000513	1.37 (7600,158,3612,103)
GO:0002682	regulation of immune system process	4.62e-06	0.000514	1.16 (7600,745,3612,412)
GO:0016570	histone modification	4.68e-06	0.000517	1.29 (7600,258,3612,158)
GO:0018130	heterocycle biosynthetic process	4.79e-06	0.000519	1.17 (7600,663,3612,370)
GO:0043488	regulation of mRNA stability	5.12e-06	0.000551	1.39 (7600,144,3612,95)
GO:0051031	tRNA transport	5.31e-06	0.000561	1.79 (7600,34,3612,29)
GO:0051640	organelle localization	5.29e-06	0.000564	1.26 (7600,318,3612,190)
GO:0032268	regulation of cellular protein metabolic process	5.49e-06	0.000576	1.12 (7600,1285,3612,683)
GO:0010468	regulation of gene expression	5.68e-06	0.00059	1.08 (7600,2221,3612,1143)
GO:1905818	regulation of chromosome separation	5.85e-06	0.000603	1.60 (7600,59,3612,45)
GO:0006351	transcription, DNA-templated	6.45e-06	0.000659	1.30 (7600,235,3612,145)
GO:0010628	positive regulation of gene expression	6.6e-06	0.000669	1.13 (7600,1040,3612,560)
GO:0043487	regulation of RNA stability	7.59e-06	0.000763	1.37 (7600,152,3612,99)
GO:0032774	RNA biosynthetic process	7.83e-06	0.000781	1.24 (7600,342,3612,202)
GO:0050794	regulation of cellular process	8.04e-06	0.000796	1.04 (7600,4548,3612,2254)
GO:0051054	positive regulation of DNA metabolic process	8.49e-06	0.000834	1.36 (7600,163,3612,105)
GO:0097659	nucleic acid-templated transcription	8.96e-06	0.000873	1.29 (7600,236,3612,145)
GO:0019083	viral transcription	9.32e-06	0.000887	1.44 (7600,105,3612,72)
GO:0016569	covalent chromatin modification	9.19e-06	0.000889	1.28 (7600,262,3612,159)
GO:2001251	negative regulation of chromosome organization	9.32e-06	0.000894	1.44 (7600,105,3612,72)
GO:0007051	spindle organization	9.65e-06	0.000911	1.43 (7600,112,3612,76)
GO:0019438	aromatic compound biosynthetic process	9.73e-06	0.000912	1.17 (7600,655,3612,364)
GO:0050684	regulation of mRNA processing	1.02e-05	0.000951	1.45 (7600,100,3612,69)
GO:0051301	cell division	1.32e-05	0.00122	1.26 (7600,280,3612,168)
GO:0030071	regulation of mitotic metaphase/anaphase transition	1.36e-05	0.00125	1.62 (7600,52,3612,40)
GO:0072395	signal transduction involved in cell cycle checkpoint	1.54e-05	0.00137	1.59 (7600,57,3612,43)
GO:0044766	multi-organism transport	1.54e-05	0.00138	1.59 (7600,57,3612,43)
GO:0010605	negative regulation of macromolecule metabolic process	1.51e-05	0.00138	1.11 (7600,1363,3612,718)
GO:1902579	multi-organism localization	1.54e-05	0.00139	1.59 (7600,57,3612,43)
GO:0019882	antigen processing and presentation	1.6e-05	0.00141	1.36 (7600,152,3612,98)
GO:0097064	ncRNA export from nucleus	1.69e-05	0.00148	1.74 (7600,35,3612,29)
GO:0006409	tRNA export from nucleus	1.73e-05	0.00151	1.78 (7600,32,3612,27)
GO:0009892	negative regulation of metabolic process	1.88e-05	0.00163	1.10 (7600,1478,3612,774)
GO:0016072	rRNA metabolic process	1.92e-05	0.00165	1.30 (7600,207,3612,128)
GO:0006397	mRNA processing	1.95e-05	0.00167	1.24 (7600,319,3612,188)
GO:0048002	antigen processing and presentation of peptide antigen	1.98e-05	0.00168	1.37 (7600,140,3612,91)
GO:0007010	cytoskeleton organization	2.08e-05	0.00176	1.20 (7600,451,3612,257)
GO:0002478	antigen processing and presentation of exogenous peptide antigen	2.3e-05	0.00192	1.37 (7600,135,3612,88)
GO:0000956	nuclear-transcribed mRNA catabolic process	2.37e-05	0.00197	1.34 (7600,162,3612,103)
GO:0006950	response to stress	2.77e-05	0.00228	1.10 (7600,1540,3612,803)
GO:0006999	nuclear pore organization	2.96e-05	0.00243	2.10 (7600,14,3612,14)
GO:1902099	regulation of metaphase/anaphase transition of cell cycle	3e-05	0.00245	1.59 (7600,53,3612,40)
GO:0034470	ncRNA processing	3.31e-05	0.00265	1.24 (7600,304,3612,179)
GO:1900034	regulation of cellular response to heat	3.31e-05	0.00266	1.54 (7600,63,3612,46)
GO:0032204	regulation of telomere maintenance	3.29e-05	0.00267	1.52 (7600,68,3612,49)
GO:0006325	chromatin organization	3.4e-05	0.0027	1.19 (7600,461,3612,261)
GO:0010948	negative regulation of cell cycle process	3.44e-05	0.00271	1.28 (7600,231,3612,140)
GO:0051053	negative regulation of DNA metabolic process	3.7e-05	0.0029	1.41 (7600,106,3612,71)
GO:0019884	antigen processing and presentation of exogenous antigen	3.81e-05	0.00297	1.36 (7600,138,3612,89)
GO:0072401	signal transduction involved in DNA integrity checkpoint	3.95e-05	0.00302	1.57 (7600,55,3612,41)
GO:1901362	organic cyclic compound biosynthetic process	3.97e-05	0.00302	1.15 (7600,716,3612,391)
GO:0072422	signal transduction involved in DNA damage checkpoint	3.95e-05	0.00304	1.57 (7600,55,3612,41)
GO:0006613	cotranslational protein targeting to membrane	3.93e-05	0.00304	1.45 (7600,87,3612,60)
GO:0045787	positive regulation of cell cycle	4.1e-05	0.0031	1.28 (7600,226,3612,137)
GO:0019219	regulation of nucleobase-containing compound metabolic process	4.24e-05	0.00318	1.08 (7600,2032,3612,1042)
GO:0051234	establishment of localization	4.33e-05	0.00323	1.08 (7600,2024,3612,1038)
GO:1901988	negative regulation of cell cycle phase transition	4.49e-05	0.00333	1.32 (7600,171,3612,107)
GO:1901991	negative regulation of mitotic cell cycle phase transition	4.67e-05	0.00344	1.32 (7600,162,3612,102)
GO:0051170	import into nucleus	5.42e-05	0.00395	1.46 (7600,79,3612,55)
GO:1900542	regulation of purine nucleotide metabolic process	5.42e-05	0.00398	1.46 (7600,79,3612,55)
GO:0033046	negative regulation of sister chromatid segregation	5.54e-05	0.00401	1.75 (7600,30,3612,25)
GO:0002218	activation of innate immune response	5.65e-05	0.00407	1.34 (7600,148,3612,94)
GO:0006612	protein targeting to membrane	5.74e-05	0.00411	1.38 (7600,114,3612,75)
GO:0006302	double-strand break repair	6.07e-05	0.00432	1.33 (7600,150,3612,95)
GO:0031145	anaphase-promoting complex-dependent catabolic process	6.14e-05	0.00435	1.49 (7600,69,3612,49)
GO:0007049	cell cycle	6.31e-05	0.00444	1.24 (7600,280,3612,165)
GO:0002376	immune system process	6.61e-05	0.00461	1.12 (7600,1038,3612,551)
GO:0002684	positive regulation of immune system process	6.6e-05	0.00462	1.17 (7600,507,3612,283)
GO:0034504	protein localization to nucleus	6.78e-05	0.0047	1.42 (7600,95,3612,64)
GO:0010639	negative regulation of organelle organization	7.25e-05	0.005	1.26 (7600,241,3612,144)
GO:0006406	mRNA export from nucleus	7.36e-05	0.00505	1.44 (7600,83,3612,57)
GO:0009889	regulation of biosynthetic process	7.82e-05	0.00533	1.07 (7600,2077,3612,1061)
GO:1903578	regulation of ATP metabolic process	8.07e-05	0.00547	1.46 (7600,78,3612,54)
GO:0044772	mitotic cell cycle phase transition	8.21e-05	0.00553	1.29 (7600,193,3612,118)
GO:0075733	intracellular transport of virus	8.54e-05	0.00572	1.61 (7600,43,3612,33)
GO:0000184	nuclear-transcribed mRNA catabolic process, nonsense-mediated decay	8.61e-05	0.00574	1.40 (7600,99,3612,66)
GO:0006366	transcription by RNA polymerase II	8.98e-05	0.00595	1.31 (7600,162,3612,101)
GO:0006401	RNA catabolic process	9.02e-05	0.00595	1.28 (7600,197,3612,120)
GO:0044770	cell cycle phase transition	9.44e-05	0.00619	1.28 (7600,199,3612,121)
GO:0048583	regulation of response to stimulus	9.81e-05	0.00641	1.08 (7600,1878,3612,963)
GO:0045786	negative regulation of cell cycle	0.000103	0.0067	1.20 (7600,364,3612,208)
GO:0070647	protein modification by small protein conjugation or removal	0.000107	0.00691	1.15 (7600,647,3612,353)
GO:0017038	protein import	0.00011	0.00705	1.40 (7600,96,3612,64)
GO:0051254	positive regulation of RNA metabolic process	0.000117	0.00751	1.12 (7600,876,3612,468)
GO:0030808	regulation of nucleotide biosynthetic process	0.000123	0.00773	1.51 (7600,60,3612,43)
GO:1900371	regulation of purine nucleotide biosynthetic process	0.000123	0.00777	1.51 (7600,60,3612,43)
GO:0008283	cell proliferation	0.000122	0.00777	1.29 (7600,185,3612,113)
GO:0006402	mRNA catabolic process	0.000125	0.00781	1.29 (7600,174,3612,107)
GO:1904872	regulation of telomerase RNA localization to Cajal body	0.000125	0.00782	1.97 (7600,16,3612,15)
GO:0034097	response to cytokine	0.000135	0.00832	1.24 (7600,264,3612,155)
GO:0043933	protein-containing complex subunit organization	0.000134	0.00834	1.12 (7600,941,3612,500)
GO:0090150	establishment of protein localization to membrane	0.000139	0.00851	1.29 (7600,178,3612,109)
GO:0062012	regulation of small molecule metabolic process	0.000143	0.00875	1.24 (7600,251,3612,148)
GO:0007088	regulation of mitotic nuclear division	0.000147	0.00896	1.36 (7600,118,3612,76)
GO:0008380	RNA splicing	0.00015	0.00909	1.23 (7600,272,3612,159)
GO:0046794	transport of virus	0.000151	0.00912	1.57 (7600,47,3612,35)
GO:0002253	activation of immune response	0.000158	0.00929	1.23 (7600,276,3612,161)
GO:0006140	regulation of nucleotide metabolic process	0.000158	0.00932	1.43 (7600,81,3612,55)
GO:0002474	antigen processing and presentation of peptide antigen via MHC class I	0.000158	0.00937	1.43 (7600,81,3612,55)
GO:0043632	modification-dependent macromolecule catabolic process	0.000157	0.00937	1.20 (7600,364,3612,207)
GO:0051985	negative regulation of chromosome segregation	0.000157	0.00939	1.70 (7600,31,3612,25)
GO:2001252	positive regulation of chromosome organization	0.000166	0.0097	1.32 (7600,140,3612,88)
GO:0050776	regulation of immune response	0.000167	0.00973	1.16 (7600,512,3612,283)
GO:0033048	negative regulation of mitotic sister chromatid segregation	0.000173	0.01	1.73 (7600,28,3612,23)
GO:0044085	cellular component biogenesis	0.000178	0.0103	1.48 (7600,64,3612,45)
GO:0090068	positive regulation of cell cycle process	0.000182	0.0104	1.28 (7600,177,3612,108)
GO:0048523	negative regulation of cellular process	0.000185	0.0106	1.07 (7600,2226,3612,1129)
GO:0032481	positive regulation of type I interferon production	0.000188	0.0107	1.50 (7600,59,3612,42)
GO:2001169	regulation of ATP biosynthetic process	0.000188	0.0107	1.50 (7600,59,3612,42)
GO:0044249	cellular biosynthetic process	0.000199	0.0112	1.10 (7600,1289,3612,671)
GO:0045930	negative regulation of mitotic cell cycle	0.000201	0.0113	1.26 (7600,209,3612,125)
GO:0048024	regulation of mRNA splicing, via spliceosome	0.000211	0.0118	1.47 (7600,66,3612,46)
GO:0045931	positive regulation of mitotic cell cycle	0.000212	0.0118	1.37 (7600,101,3612,66)
GO:0019941	modification-dependent protein catabolic process	0.00022	0.0122	1.19 (7600,354,3612,201)
GO:0050778	positive regulation of immune response	0.000224	0.0123	1.19 (7600,385,3612,217)
GO:0032465	regulation of cytokinesis	0.000243	0.0134	1.53 (7600,51,3612,37)
GO:0034250	positive regulation of cellular amide metabolic process	0.000255	0.014	1.36 (7600,105,3612,68)
GO:0006614	SRP-dependent cotranslational protein targeting to membrane	0.000259	0.0141	1.41 (7600,82,3612,55)
GO:0006511	ubiquitin-dependent protein catabolic process	0.00026	0.0141	1.19 (7600,349,3612,198)
GO:0045089	positive regulation of innate immune response	0.000266	0.0143	1.26 (7600,195,3612,117)
GO:0065003	protein-containing complex assembly	0.000266	0.0143	1.13 (7600,774,3612,414)
GO:0043484	regulation of RNA splicing	0.000271	0.0145	1.37 (7600,98,3612,64)
GO:0000278	mitotic cell cycle	0.000283	0.0151	1.39 (7600,91,3612,60)
GO:1901576	organic substance biosynthetic process	0.000287	0.0151	1.09 (7600,1343,3612,696)
GO:0031326	regulation of cellular biosynthetic process	0.000288	0.0151	1.07 (7600,2039,3612,1036)
GO:0022613	ribonucleoprotein complex biogenesis	0.000286	0.0152	1.49 (7600,58,3612,41)
GO:0048511	rhythmic process	0.000293	0.0153	1.33 (7600,127,3612,80)
GO:2001020	regulation of response to DNA damage stimulus	0.000293	0.0153	1.29 (7600,160,3612,98)
GO:1904356	regulation of telomere maintenance via telomere lengthening	0.000299	0.0155	1.51 (7600,53,3612,38)
GO:0050896	response to stimulus	0.000304	0.0157	1.06 (7600,2281,3612,1153)
GO:0032479	regulation of type I interferon production	0.000313	0.016	1.38 (7600,93,3612,61)
GO:2000107	negative regulation of leukocyte apoptotic process	0.000313	0.0161	1.87 (7600,18,3612,16)
GO:1905508	protein localization to microtubule organizing center	0.000313	0.0161	1.87 (7600,18,3612,16)
GO:0051172	negative regulation of nitrogen compound metabolic process	0.000322	0.0164	1.10 (7600,1202,3612,626)
GO:0043467	regulation of generation of precursor metabolites and energy	0.000345	0.0175	1.37 (7600,95,3612,62)
GO:0018205	peptidyl-lysine modification	0.000375	0.0189	1.24 (7600,215,3612,127)
GO:0044087	regulation of cellular component biogenesis	0.000378	0.0189	1.16 (7600,499,3612,274)
GO:0006110	regulation of glycolytic process	0.000377	0.019	1.51 (7600,50,3612,36)
GO:0042176	regulation of protein catabolic process	0.000385	0.0192	1.23 (7600,234,3612,137)
GO:0006364	rRNA processing	0.000393	0.0195	1.26 (7600,187,3612,112)
GO:0044248	cellular catabolic process	0.000411	0.0203	1.10 (7600,1006,3612,528)
GO:0006260	DNA replication	0.000447	0.022	1.31 (7600,130,3612,81)
GO:0030811	regulation of nucleotide catabolic process	0.000459	0.0224	1.50 (7600,52,3612,37)
GO:0031349	positive regulation of defense response	0.000458	0.0225	1.23 (7600,229,3612,134)
GO:0032446	protein modification by small protein conjugation	0.000472	0.023	1.15 (7600,520,3612,284)
GO:0006810	transport	0.00051	0.0248	1.07 (7600,1932,3612,981)
GO:2000816	negative regulation of mitotic sister chromatid separation	0.000524	0.0253	1.70 (7600,26,3612,21)
GO:0002683	negative regulation of immune system process	0.000533	0.0256	1.24 (7600,205,3612,121)
GO:0051193	regulation of cofactor metabolic process	0.000535	0.0257	1.43 (7600,66,3612,45)
GO:0034655	nucleobase-containing compound catabolic process	0.000547	0.0261	1.20 (7600,287,3612,164)
GO:0043161	proteasome-mediated ubiquitin-dependent protein catabolic process	0.00056	0.0266	1.23 (7600,226,3612,132)
GO:0051783	regulation of nuclear division	0.000563	0.0267	1.31 (7600,127,3612,79)
GO:0009058	biosynthetic process	0.000592	0.0274	1.08 (7600,1360,3612,701)
GO:0034162	toll-like receptor 9 signaling pathway	0.000584	0.0275	2.10 (7600,10,3612,10)
GO:0071539	protein localization to centrosome	0.00059	0.0275	1.86 (7600,17,3612,15)
GO:0001649	osteoblast differentiation	0.000587	0.0275	1.56 (7600,39,3612,29)
GO:0006275	regulation of DNA replication	0.000589	0.0275	1.39 (7600,82,3612,54)
GO:0000727	double-strand break repair via break-induced replication	0.000584	0.0276	2.10 (7600,10,3612,10)
GO:0051603	proteolysis involved in cellular protein catabolic process	0.000601	0.0276	1.17 (7600,392,3612,218)
GO:0022414	reproductive process	0.000602	0.0276	1.15 (7600,488,3612,267)
GO:1902680	positive regulation of RNA biosynthetic process	0.0006	0.0277	1.11 (7600,812,3612,430)
GO:0045727	positive regulation of translation	0.000614	0.0281	1.36 (7600,91,3612,59)
GO:0000086	G2/M transition of mitotic cell cycle	0.00062	0.0282	1.35 (7600,100,3612,64)
GO:0034249	negative regulation of cellular amide metabolic process	0.000655	0.0297	1.33 (7600,111,3612,70)
GO:0006508	proteolysis	0.00067	0.0303	1.13 (7600,653,3612,350)
GO:1903508	positive regulation of nucleic acid-templated transcription	0.000683	0.0305	1.11 (7600,811,3612,429)
GO:0045893	positive regulation of transcription, DNA-templated	0.000683	0.0306	1.11 (7600,811,3612,429)
GO:0010941	regulation of cell death	0.000688	0.0306	1.11 (7600,789,3612,418)
GO:0031324	negative regulation of cellular metabolic process	0.00068	0.0306	1.09 (7600,1286,3612,664)
GO:1901532	regulation of hematopoietic progenitor cell differentiation	0.000691	0.0307	1.41 (7600,70,3612,47)
GO:0000226	microtubule cytoskeleton organization	0.000694	0.0307	1.22 (7600,244,3612,141)
GO:0044089	positive regulation of cellular component biogenesis	0.000701	0.0309	1.21 (7600,267,3612,153)
GO:0060147	regulation of posttranscriptional gene silencing	0.000777	0.0337	1.40 (7600,72,3612,48)
GO:0051130	positive regulation of cellular component organization	0.000768	0.0337	1.13 (7600,644,3612,345)
GO:0006270	DNA replication initiation	0.000776	0.0339	1.65 (7600,28,3612,22)
GO:0060966	regulation of gene silencing by RNA	0.000777	0.0339	1.40 (7600,72,3612,48)
GO:0017148	negative regulation of translation	0.000788	0.034	1.34 (7600,97,3612,62)
GO:0045088	regulation of innate immune response	0.000785	0.034	1.21 (7600,256,3612,147)
GO:0043067	regulation of programmed cell death	0.00079	0.034	1.12 (7600,728,3612,387)
GO:0071345	cellular response to cytokine stimulus	0.000803	0.0344	1.24 (7600,199,3612,117)
GO:0070972	protein localization to endoplasmic reticulum	0.000829	0.0354	1.32 (7600,108,3612,68)
GO:0046649	lymphocyte activation	0.000849	0.0361	1.24 (7600,186,3612,110)
GO:1902850	microtubule cytoskeleton organization involved in mitosis	0.000853	0.0362	1.36 (7600,90,3612,58)
GO:0045841	negative regulation of mitotic metaphase/anaphase transition	0.000902	0.0381	1.68 (7600,25,3612,20)
GO:0010629	negative regulation of gene expression	0.000916	0.0386	1.10 (7600,926,3612,485)
GO:0010556	regulation of macromolecule biosynthetic process	0.00092	0.0386	1.06 (7600,1951,3612,987)
GO:1904874	positive regulation of telomerase RNA localization to Cajal body	0.000961	0.0402	1.94 (7600,13,3612,12)
GO:0051196	regulation of coenzyme metabolic process	0.000968	0.0402	1.45 (7600,55,3612,38)
GO:0031347	regulation of defense response	0.000965	0.0402	1.17 (7600,377,3612,209)
GO:0097711	ciliary basal body-plasma membrane docking	0.000994	0.0412	1.40 (7600,69,3612,46)
Species used: Homo sapiens
The system has recognized 11355 genes out of 11435 gene terms entered by the user.
0 genes were recognized by gene symbol and 11355 genes by other gene IDs .
3653 duplicate genes were removed (keeping the highest ranking instance of each gene) leaving a total of 7702 genes.
Only 7600 of these genes are associated with a GO term.

## Sheet: jy_raji_function
GO term	Description	P-value	FDR q-value	Enrichment (N, B, n, b)
GO:0003723	RNA binding	2.77e-29	9.7e-26	1.31 (7600,1206,3612,751)
GO:0003676	nucleic acid binding	1.23e-20	2.15e-17	1.18 (7600,2185,3612,1221)
GO:0005515	protein binding	4.71e-17	5.49e-14	1.05 (7600,6249,3612,3108)
GO:1901363	heterocyclic compound binding	1.61e-15	1.41e-12	1.12 (7600,3064,3612,1625)
GO:0097159	organic cyclic compound binding	6.15e-15	4.3e-12	1.11 (7600,3088,3612,1633)
GO:0019899	enzyme binding	1.07e-10	6.25e-08	1.17 (7600,1238,3612,691)
GO:0005488	binding	5.54e-09	2.77e-06	1.02 (7600,6932,3612,3365)
GO:0003682	chromatin binding	1.02e-08	4.45e-06	1.31 (7600,341,3612,213)
GO:0017111	nucleoside-triphosphatase activity	1.93e-08	7.5e-06	1.26 (7600,471,3612,282)
GO:0003729	mRNA binding	3.74e-08	1.31e-05	1.40 (7600,195,3612,130)
GO:0016462	pyrophosphatase activity	1.09e-07	2.72e-05	1.24 (7600,498,3612,293)
GO:0016818	hydrolase activity, acting on acid anhydrides, in phosphorus-containing anhydrides	1.09e-07	2.92e-05	1.24 (7600,498,3612,293)
GO:0004386	helicase activity	9.51e-08	3.02e-05	1.48 (7600,131,3612,92)
GO:0016817	hydrolase activity, acting on acid anhydrides	1.09e-07	3.17e-05	1.24 (7600,498,3612,293)
GO:0005524	ATP binding	3.32e-06	0.000726	1.15 (7600,877,3612,480)
GO:0030554	adenyl nucleotide binding	3.54e-06	0.000728	1.15 (7600,909,3612,496)
GO:0008144	drug binding	3.17e-06	0.000739	1.15 (7600,942,3612,513)
GO:0035639	purine ribonucleoside triphosphate binding	4.79e-06	0.000931	1.14 (7600,1022,3612,552)
GO:0017076	purine nucleotide binding	5.7e-06	0.00105	1.13 (7600,1055,3612,568)
GO:0032559	adenyl ribonucleotide binding	7.9e-06	0.00132	1.14 (7600,900,3612,489)
GO:0032553	ribonucleotide binding	7.72e-06	0.00135	1.13 (7600,1053,3612,566)
GO:0016887	ATPase activity	1.04e-05	0.00165	1.29 (7600,242,3612,148)
GO:0044877	protein-containing complex binding	1.11e-05	0.00168	1.17 (7600,642,3612,357)
GO:0032555	purine ribonucleotide binding	1.21e-05	0.00176	1.13 (7600,1044,3612,560)
GO:1901265	nucleoside phosphate binding	1.36e-05	0.0019	1.12 (7600,1181,3612,628)
GO:0000166	nucleotide binding	1.56e-05	0.0021	1.12 (7600,1180,3612,627)
GO:0045296	cadherin binding	1.84e-05	0.0023	1.29 (7600,229,3612,140)
GO:0043021	ribonucleoprotein complex binding	1.78e-05	0.00231	1.42 (7600,108,3612,73)
GO:0051020	GTPase binding	3.9e-05	0.0047	1.27 (7600,237,3612,143)
GO:0019901	protein kinase binding	4.09e-05	0.00476	1.21 (7600,381,3612,219)
GO:0008134	transcription factor binding	4.24e-05	0.00479	1.21 (7600,385,3612,221)
GO:0017056	structural constituent of nuclear pore	8.65e-05	0.00945	1.89 (7600,20,3612,18)
GO:0140098	catalytic activity, acting on RNA	9.76e-05	0.0103	1.24 (7600,276,3612,162)
GO:0036094	small molecule binding	0.000138	0.0142	1.10 (7600,1298,3612,677)
GO:0003724	RNA helicase activity	0.000149	0.0149	1.49 (7600,62,3612,44)
GO:0097367	carbohydrate derivative binding	0.000153	0.0149	1.11 (7600,1127,3612,592)
GO:0008139	nuclear localization sequence binding	0.000165	0.0156	1.88 (7600,19,3612,17)
GO:0042623	ATPase activity, coupled	0.000196	0.0181	1.29 (7600,168,3612,103)
GO:0043168	anion binding	0.000218	0.0195	1.09 (7600,1371,3612,711)
GO:0019900	kinase binding	0.000301	0.0257	1.17 (7600,439,3612,244)
GO:0019904	protein domain specific binding	0.000299	0.0261	1.19 (7600,369,3612,208)
GO:0003688	DNA replication origin binding	0.000335	0.0272	1.80 (7600,21,3612,18)
GO:0048027	mRNA 5'-UTR binding	0.000335	0.0279	1.80 (7600,21,3612,18)
GO:0003743	translation initiation factor activity	0.000366	0.0291	1.58 (7600,40,3612,30)
GO:0008135	translation factor activity, RNA binding	0.0004	0.0311	1.46 (7600,62,3612,43)
GO:0003712	transcription coregulator activity	0.000587	0.0446	1.19 (7600,322,3612,182)
GO:0042605	peptide antigen binding	0.00061	0.0454	1.79 (7600,20,3612,17)
GO:0003674	molecular_function	0.000678	0.0494	1.01 (7600,7335,3612,3512)
GO:0042393	histone binding	0.00078	0.0557	1.27 (7600,152,3612,92)
GO:0050839	cell adhesion molecule binding	0.000819	0.0573	1.20 (7600,285,3612,162)
GO:0032452	histone demethylase activity	0.000902	0.0619	1.68 (7600,25,3612,20)
Species used: Homo sapiens
The system has recognized 11355 genes out of 11435 gene terms entered by the user.
0 genes were recognized by gene symbol and 11355 genes by other gene IDs .
3653 duplicate genes were removed (keeping the highest ranking instance of each gene) leaving a total of 7702 genes.
Only 7600 of these genes are associated with a GO term.
The GOrilla database is periodically updated using the GO database and other sources.
The GOrilla database was last updated on Mar 6, 2021

## Sheet: jy_raji_component
GO term	Description	P-value	FDR q-value	Enrichment (N, B, n, b)
GO:0032991	protein-containing complex	1.99e-33	3.45e-30	1.18 (7600,3067,3612,1714)
GO:0044424	intracellular part	3.97e-22	3.45e-19	1.04 (7600,6885,3612,3393)
GO:0005829	cytosol	2.04e-21	1.18e-18	1.14 (7600,3029,3612,1641)
GO:0044428	nuclear part	3.16e-21	1.37e-18	1.14 (7600,3031,3612,1641)
GO:0005654	nucleoplasm	8.18e-18	2.84e-15	1.15 (7600,2480,3612,1353)
GO:0044446	intracellular organelle part	2.32e-17	6.71e-15	1.07 (7600,5219,3612,2650)
GO:0044422	organelle part	1.03e-15	2.56e-13	1.06 (7600,5283,3612,2670)
GO:0043229	intracellular organelle	2e-14	4.35e-12	1.06 (7600,5129,3612,2592)
GO:0043232	intracellular non-membrane-bounded organelle	8.59e-14	1.66e-11	1.17 (7600,1656,3612,920)
GO:0043228	non-membrane-bounded organelle	1.61e-13	2.8e-11	1.17 (7600,1661,3612,921)
GO:0043226	organelle	2.59e-12	4.09e-10	1.05 (7600,5477,3612,2738)
GO:0044451	nucleoplasm part	4.31e-11	6.23e-09	1.23 (7600,805,3612,470)
GO:1990904	ribonucleoprotein complex	1.05e-10	1.4e-08	1.26 (7600,626,3612,374)
GO:0044444	cytoplasmic part	1.52e-10	1.89e-08	1.06 (7600,4964,3612,2490)
GO:0005634	nucleus	1.67e-09	1.93e-07	1.09 (7600,2764,3612,1438)
GO:0043231	intracellular membrane-bounded organelle	9.49e-09	1.03e-06	1.06 (7600,4329,3612,2179)
GO:0043227	membrane-bounded organelle	1.08e-08	1.1e-06	1.05 (7600,4909,3612,2450)
GO:0016604	nuclear body	1.76e-08	1.69e-06	1.24 (7600,548,3612,323)
GO:0005737	cytoplasm	2.34e-08	2.14e-06	1.10 (7600,2417,3612,1260)
GO:0044464	cell part	5.26e-08	4.56e-06	1.02 (7600,7160,3612,3457)
GO:1902494	catalytic complex	1.09e-07	9.01e-06	1.17 (7600,933,3612,518)
GO:0044427	chromosomal part	9.05e-07	7.14e-05	1.16 (7600,850,3612,470)
GO:0005730	nucleolus	1.87e-06	0.000141	1.19 (7600,602,3612,341)
GO:0000922	spindle pole	3.93e-06	0.000284	1.45 (7600,112,3612,77)
GO:0016607	nuclear speck	4.35e-06	0.000302	1.28 (7600,280,3612,170)
GO:0044450	microtubule organizing center part	1.87e-05	0.0012	1.34 (7600,165,3612,105)
GO:0010494	cytoplasmic stress granule	1.86e-05	0.00124	1.60 (7600,54,3612,41)
GO:0044445	cytosolic part	2.65e-05	0.00164	1.32 (7600,175,3612,110)
GO:0005643	nuclear pore	3.13e-05	0.00175	1.64 (7600,45,3612,35)
GO:0022625	cytosolic large ribosomal subunit	3.13e-05	0.00181	1.64 (7600,45,3612,35)
GO:0098687	chromosomal region	3.34e-05	0.00181	1.32 (7600,172,3612,108)
GO:0016363	nuclear matrix	3.05e-05	0.00183	1.48 (7600,78,3612,55)
GO:0044430	cytoskeletal part	4.95e-05	0.00253	1.13 (7600,882,3612,474)
GO:0031982	vesicle	4.89e-05	0.00257	1.10 (7600,1492,3612,777)
GO:0000781	chromosome, telomeric region	5.74e-05	0.00284	1.38 (7600,114,3612,75)
GO:1905368	peptidase complex	7.36e-05	0.00355	1.48 (7600,71,3612,50)
GO:0044216	other organism cell	8.54e-05	0.0039	1.61 (7600,43,3612,33)
GO:0043657	host cell	8.54e-05	0.004	1.61 (7600,43,3612,33)
GO:0044217	other organism part	0.000115	0.005	1.59 (7600,45,3612,34)
GO:0044454	nuclear chromosome part	0.000113	0.00502	1.30 (7600,170,3612,105)
GO:0005575	cellular_component	0.000132	0.00557	1.01 (7600,7396,3612,3541)
GO:1905369	endopeptidase complex	0.000154	0.00638	1.51 (7600,57,3612,41)
GO:0005814	centriole	0.000222	0.00896	1.39 (7600,94,3612,62)
GO:0000502	proteasome complex	0.000237	0.00936	1.50 (7600,56,3612,40)
GO:0035770	ribonucleoprotein granule	0.00027	0.0104	1.28 (7600,169,3612,103)
GO:0016020	membrane	0.00034	0.0128	1.05 (7600,3331,3612,1657)
GO:0005813	centrosome	0.000357	0.0132	1.18 (7600,366,3612,206)
GO:0005819	spindle	0.000385	0.0139	1.27 (7600,172,3612,104)
GO:0070062	extracellular exosome	0.000525	0.0186	1.10 (7600,1004,3612,526)
GO:0030117	membrane coat	0.000587	0.0204	1.56 (7600,39,3612,29)
GO:0005876	spindle microtubule	0.000698	0.0238	1.49 (7600,51,3612,36)
GO:1904813	ficolin-1-rich granule lumen	0.000728	0.0243	1.35 (7600,95,3612,61)
GO:1903561	extracellular vesicle	0.000935	0.0285	1.10 (7600,1011,3612,527)
GO:0036464	cytoplasmic ribonucleoprotein granule	0.000917	0.0289	1.26 (7600,160,3612,96)
GO:0043230	extracellular organelle	0.000935	0.029	1.10 (7600,1011,3612,527)
GO:0032993	protein-DNA complex	0.000913	0.0293	1.37 (7600,83,3612,54)
GO:1990234	transferase complex	0.0009	0.0295	1.14 (7600,526,3612,285)
Species used: Homo sapiens
The system has recognized 11355 genes out of 11435 gene terms entered by the user.
0 genes were recognized by gene symbol and 11355 genes by other gene IDs .
3653 duplicate genes were removed (keeping the highest ranking instance of each gene) leaving a total of 7702 genes.
Only 7600 of these genes are associated with a GO term.
The GOrilla database is periodically updated using the GO database and other sources.
The GOrilla database was last updated on Mar 6, 2021

## Sheet: raji_process
No GO Enrichment Found
There are no GO terms with an enrichment p-value above the value you specified
Species used: Homo sapiens
The system has recognized 9948 genes out of 10030 gene terms entered by the user.
0 genes were recognized by gene symbol and 9948 genes by other gene IDs .
2246 duplicate genes were removed (keeping the highest ranking instance of each gene) leaving a total of 7702 genes.
Only 7600 of these genes are associated with a GO term.
The GOrilla database is periodically updated using the GO database and other sources.
The GOrilla databse was last updated on Mar 6, 2021

## Sheet: raji_function
GO term	Description	P-value	FDR q-value	Enrichment (N, B, n, b)	Genes
GO:0005484	SNAP receptor activity	6.71e-05	0.235	2.47 (7600,21,2200,15)	[+] Show genes
Species used: Homo sapiens
The system has recognized 9948 genes out of 10030 gene terms entered by the user.
0 genes were recognized by gene symbol and 9948 genes by other gene IDs .
2246 duplicate genes were removed (keeping the highest ranking instance of each gene) leaving a total of 7702 genes.
Only 7600 of these genes are associated with a GO term.
The GOrilla database is periodically updated using the GO database and other sources.
The GOrilla database was last updated on Mar 6, 2021
This results page will be available on this site for one month from now (until Dec 29, 2022 ). You can bookmark this page and come back to it later.

## Sheet: raji_component
GO term	Description	P-value	FDR q-value	Enrichment (N, B, n, b)	Genes
GO:0031201	SNARE complex	0.000107	0.186	2.22 (7600,28,2200,18)	[+] Show genes
Species used: Homo sapiens
The system has recognized 9948 genes out of 10030 gene terms entered by the user.
0 genes were recognized by gene symbol and 9948 genes by other gene IDs .
2246 duplicate genes were removed (keeping the highest ranking instance of each gene) leaving a total of 7702 genes.
Only 7600 of these genes are associated with a GO term.
The GOrilla database is periodically updated using the GO database and other sources.
The GOrilla database was last updated on Mar 6, 2021
This results page will be available on this site for one month from now (until Dec 29, 2022 ). You can bookmark this page and come back to it later.
